# Supplementary material for: Microwave-assisted ZnO-decorated carbon urchin resembling ‘shish-kebab’ morphology with self-healing and enhanced electromagnetic shielding properties
Source: Royal Society of Chemistry journal article supplement (doi:10.1039/d3nr05758e), 2024-01-01
Supplement: d3nr05758e1.pdf [file d3nr05758e1.pdf]

## Microwave-assisted ZnO decorated carbon urchin resembling ‘shish-kebab’ morphology with self-healing and enhanced electromagnetic shielding properties

Sandeep Kumar Singh<sup>†,\*</sup>, Rishi Raj<sup>†</sup>, Akshay Salvi, Sampath Parasuram, S. Kumar, Suryasarathi Bose\*

Department of Materials Engineering, Indian Institute of Science, Bangalore 560012, India

<sup>†</sup>Authors contributed equally, \*Corresponding Author: Email: [sandks86@gmail.com](mailto:sandks86@gmail.com)  
[sbose@iisc.ac.in](mailto:sbose@iisc.ac.in)

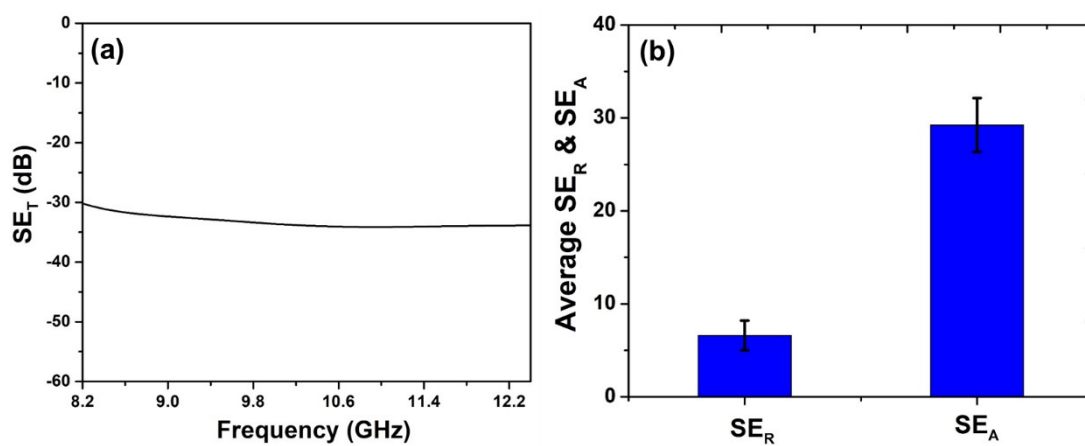

Fig. S1.  $SE_T$  and average  $SE_R$ - $SE_A$  of 2wt. % CU/PEI composite
